# Supplementary material for: Patterns of eukaryotic diversity from the surface to the deep-ocean sediment
Source: PubMed Central journal article supplement — Sci Adv. 2022 Feb 4;8(5):eabj9309. doi: 10.1126/sciadv.abj9309 (PMC8816347; doi:10.1126/sciadv.abj9309), 2022-02-04
Supplement: sciadv.abj9309_sm.pdf [file sciadv.abj9309_sm.pdf]

Supplementary Materials for  
**Patterns of eukaryotic diversity from the surface to the deep-ocean sediment**

Tristan Cordier\*, Inès Barrenechea Angeles, Nicolas Henry, Franck Lejzerowicz,  
Cédric Berney, Raphaël Morard, Angelika Brandt, Marie-Anne Cambon-Bonavita,  
Lionel Guidi, Fabien Lombard, Pedro Martinez Arbizu, Ramon Massana, Covadonga Orejas,  
Julie Poulain, Craig R. Smith, Patrick Wincker, Sophie Arnaud-Haond, Andrew J. Gooday\*,  
Colomban de Vargas\*, Jan Pawlowski\*

\*Corresponding author. Email: tristan.cordier@norceresearch.no (T.C.); ang@noc.ac.uk (A.J.G.);  
vargas@sb-roscoff.fr (C.d.V.); jan.pawlowski@unige.ch (J.P.)

Published 4 February 2022, *Sci. Adv.* **8**, eabj9309 (2022)  
DOI: 10.1126/sciadv.abj9309

**The PDF file includes:**

Figs. S1 to S13  
Tables S1 and S4  
Legends for tables S2, S3, S5 to S8  
References

**Other Supplementary Material for this manuscript includes the following:**

Tables S2, S3, S5 to S8

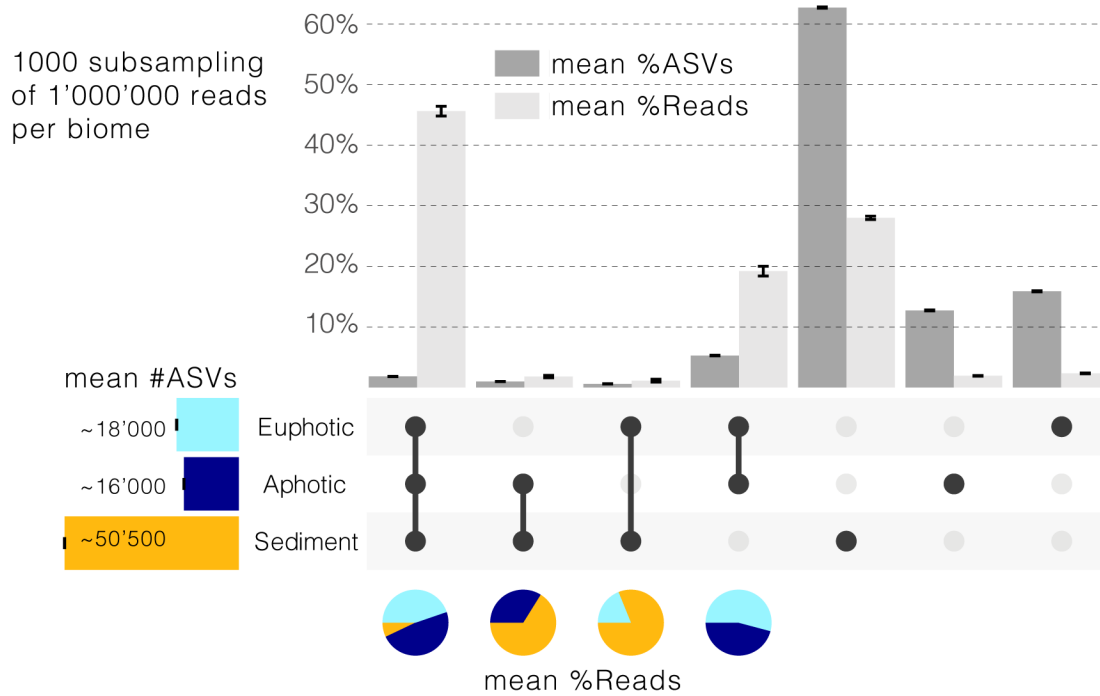

Figure S1: Normalized richness and distribution of eukaryotic ASVs within and across oceanic realms (pelagic euphotic, pelagic aphotic and sediment). Each realm dataset was aggregated into single vector prior to subsampling 1000 times at a depth of one million reads. The top panel barplot shows the mean proportion of ASVs and reads abundance within and across realms (standard deviation across 1000 draws is indicated on each bar). The left panel shows the mean normalized overall ASV richness (and standard deviations) for each realm. The bottom pie charts indicate the average contribution of each realm in number of reads to realm intersections.

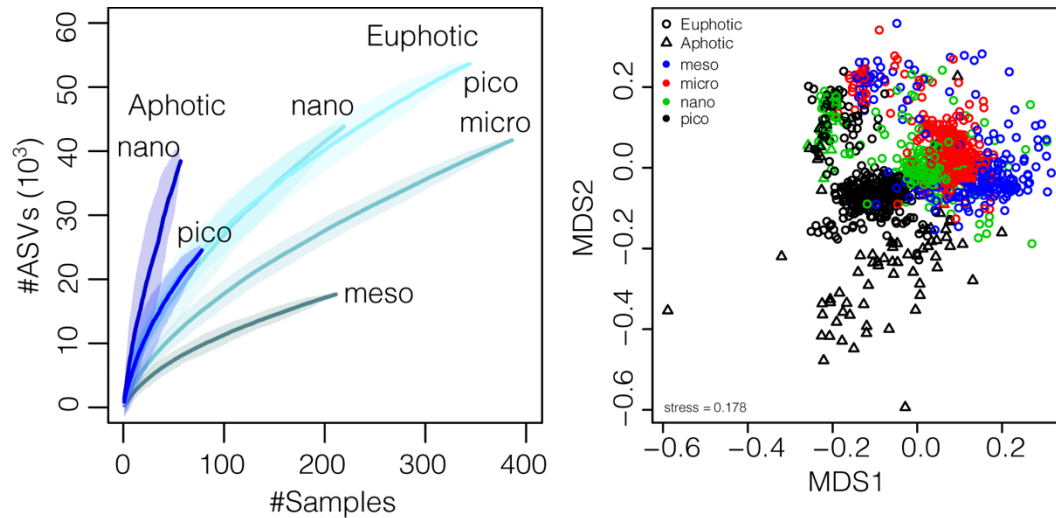

Figure S2: Effect of size fractionation of pelagic samples on the alpha- and beta-diversity. Left panel: ASVs accumulation curves as a function of sampling effort. Pelagic aphotic samples are in dark blue and pelagic euphotic are in light blue, and size fractions are indicated at the tips of the curves. The nano fraction of the aphotic samples is particularly richer than any other size fraction. Right panel: Non-metric multidimensional scaling ordination of the pelagic samples. The ordination was performed on a Bray-Curtis dissimilarity matrix computed from normalized reads counts using the cumulative sum scaling method. The stress value is indicated on the plot. The size fractions are clustering separately on the ordination.

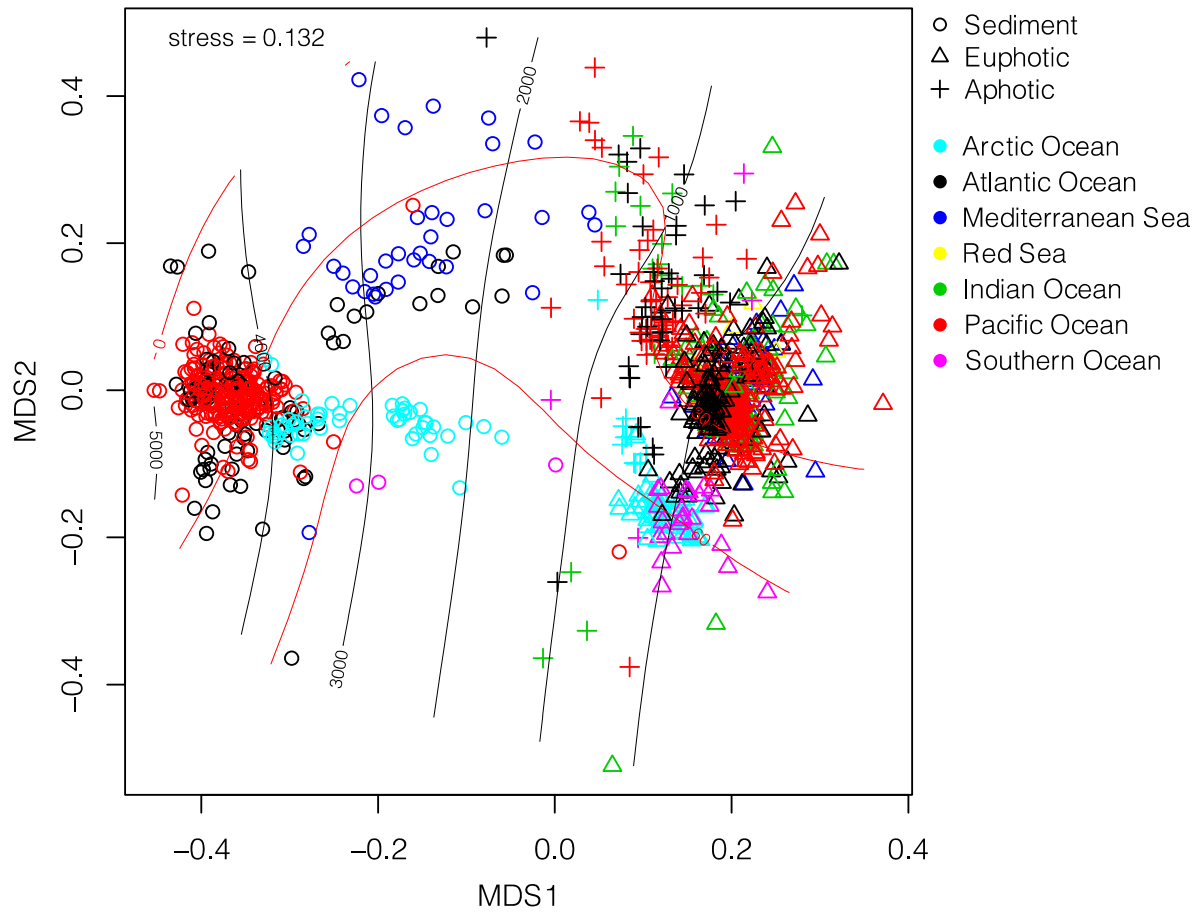

Figure S3: Structure of eukaryotic communities across realms (pelagic euphotic, pelagic aphotic with only nano and pico fractions, and deep sediment) and as a function of geographic basin. The ordination is a Non-metric multidimensional scaling of the Bray-Curtis dissimilarity matrix computed from normalized reads counts using the cumulative sum scaling method. The red and black lines on the ordination represent, respectively, the absolute latitude and depth as fitted surfaces to the ordination.

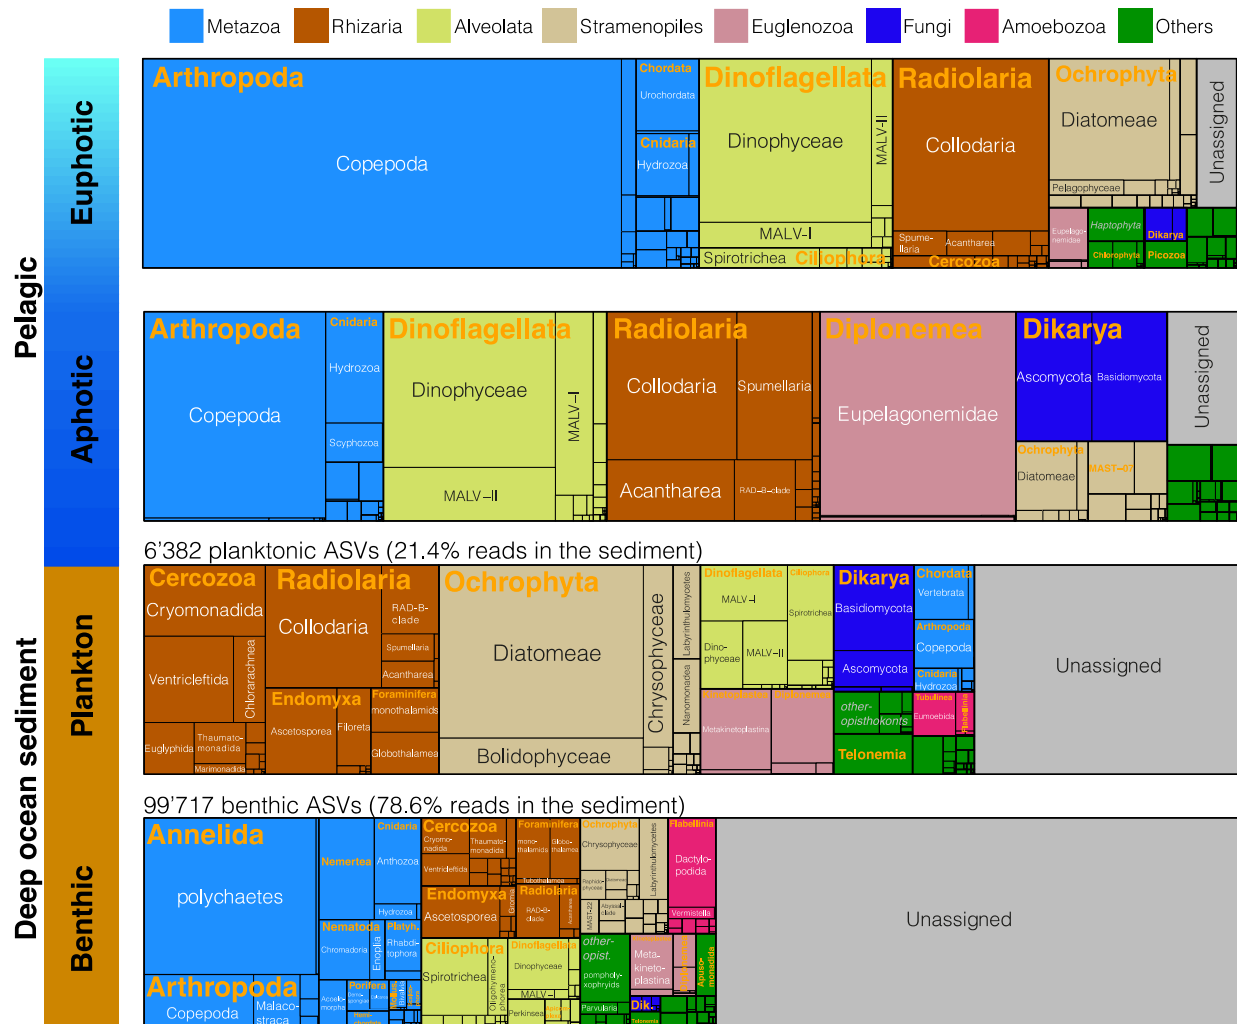

Figure S4: Taxonomic composition (ASVs abundance) of eukaryotic groups in the pelagic euphotic, pelagic aphotic, and deep-ocean sediment realms (see Table S3 for details).

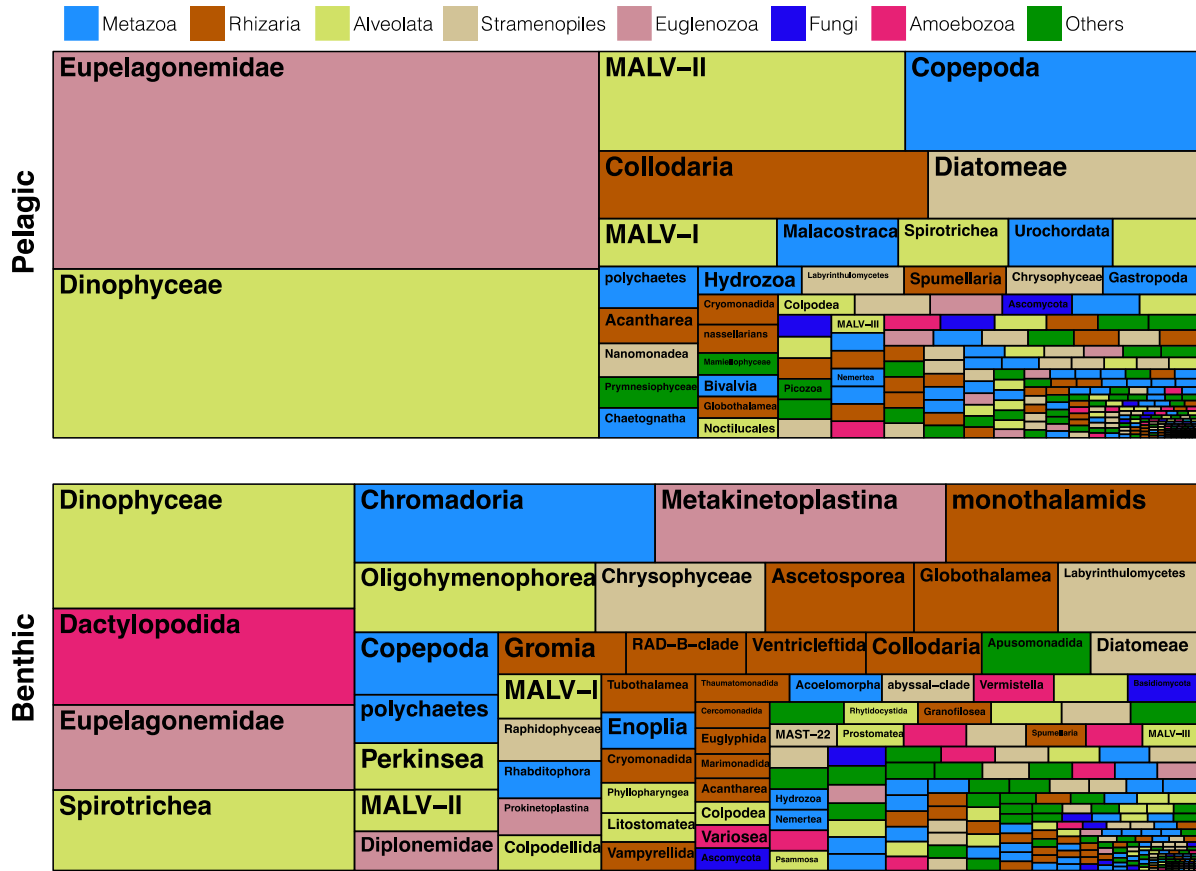

Figure S5: Taxonomic composition (ASVs richness) between the pelagic and the benthic communities (euphotic and aphotic are grouped and unassigned ASVs discarded).

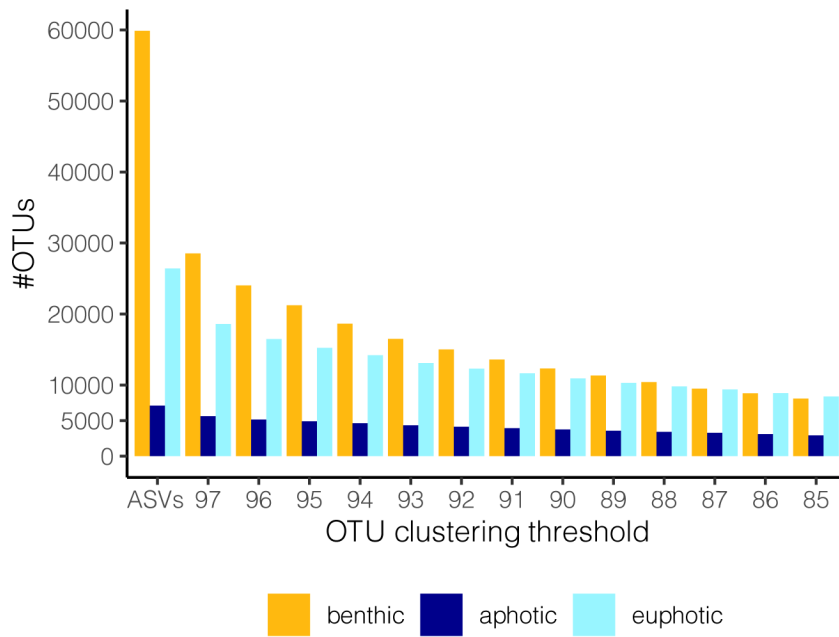

Figure S6: Number of Operational Taxonomic Units (OTUs) formed from unassigned eukaryotic ASVs as a function of similarity cutoff. The number of ASVs before clustering is indicated on the left side of the plot.

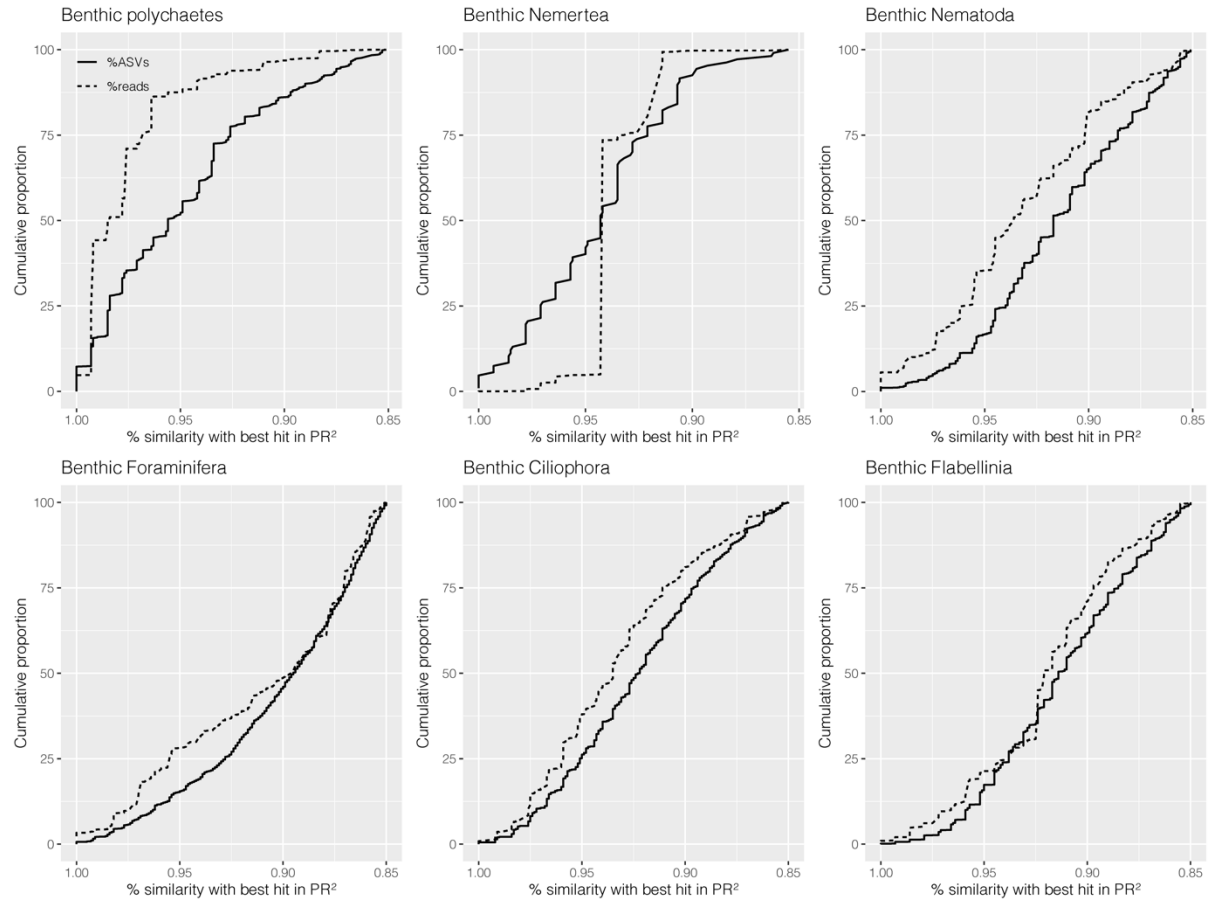

Figure S7: Cumulative proportion of ASVs and reads abundance as a function of similarity with best hit with a reference sequence in PR<sup>2</sup> for selected benthic taxonomic groups.



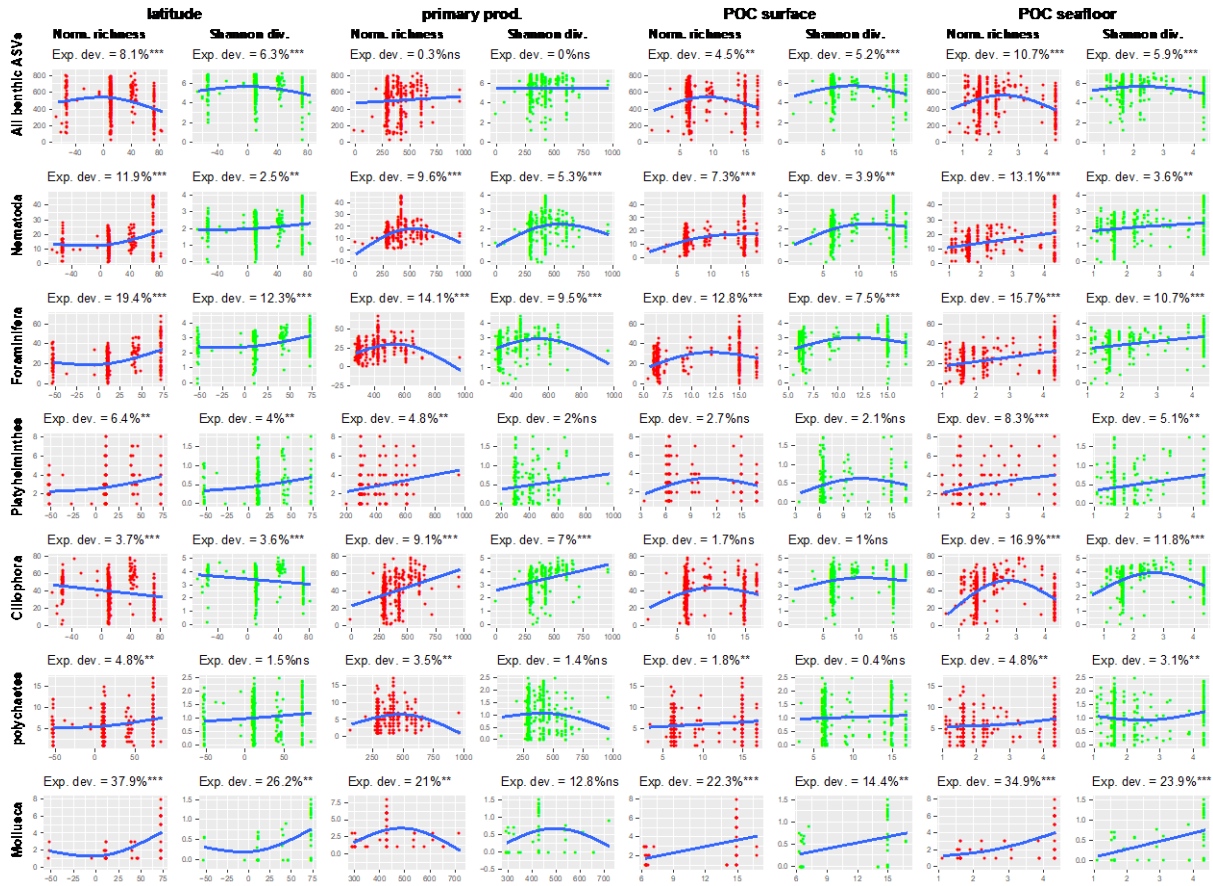

Figure S8: Benthic alpha diversity variation along gradients of latitudes, primary productivity, POC export from the surface and POC reaching the seafloor. In red is the normalized richness obtained by rarefying the ASV table and in green is the Shannon diversity. Blues lines are fitted generalized additive models ( $s=3$ ) and shades are 95% confidence intervals. The explained deviance for each combination is indicated on the top of the plots as well as the significance of the relationship (ns: non-significant, \*:  $p < 0.05$ , \*\*:  $p < 0.01$ , \*\*\*:  $p < 0.001$ ).

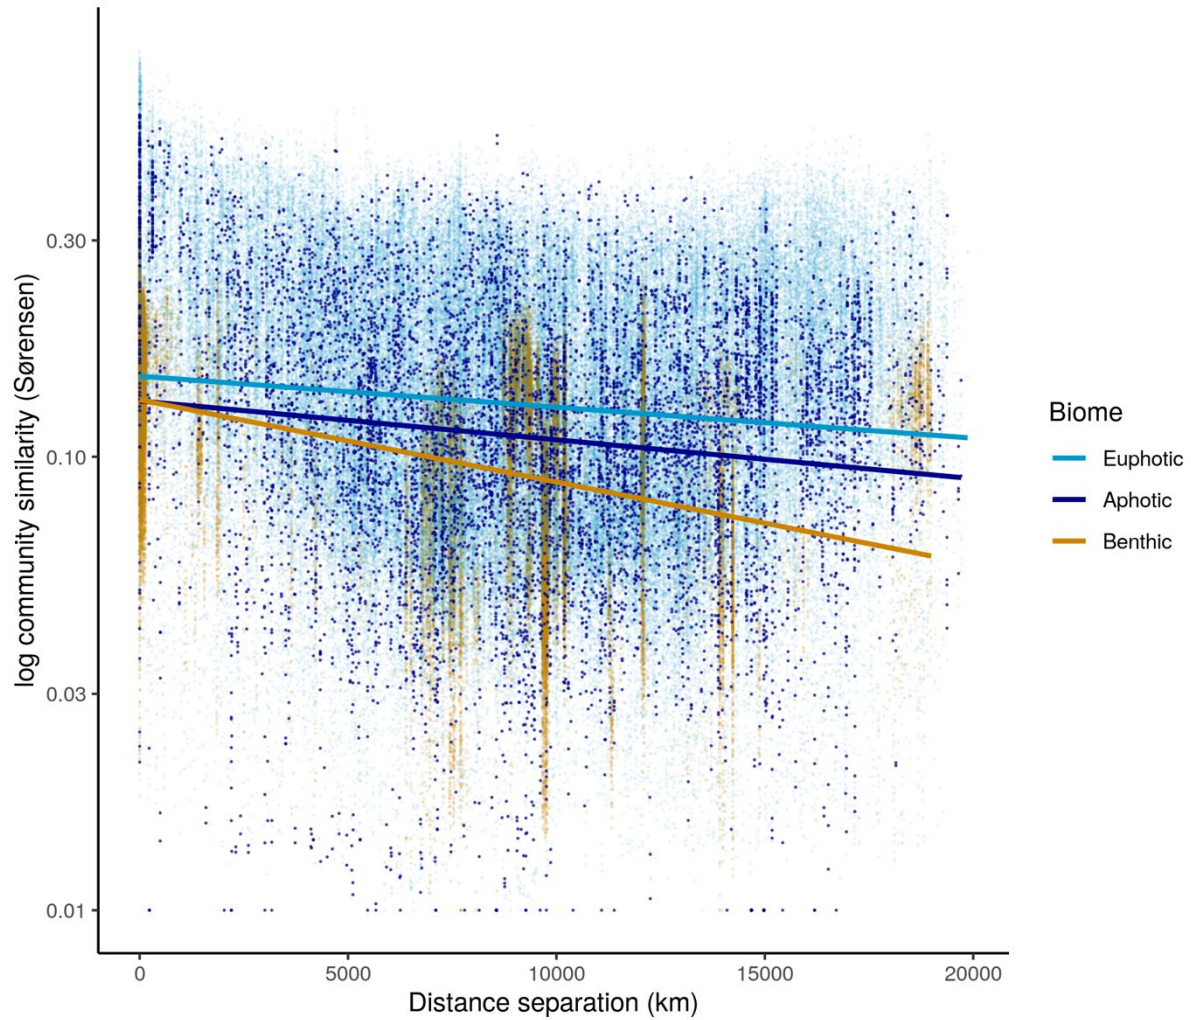

Figure S9: Distance decay of Sørensen similarities (log transformed) as a function of distance separation between samples of the pelagic euphotic, pelagic aphotic and benthic communities. Similarity matrices were averages over ten rarefactions draws of community matrices.

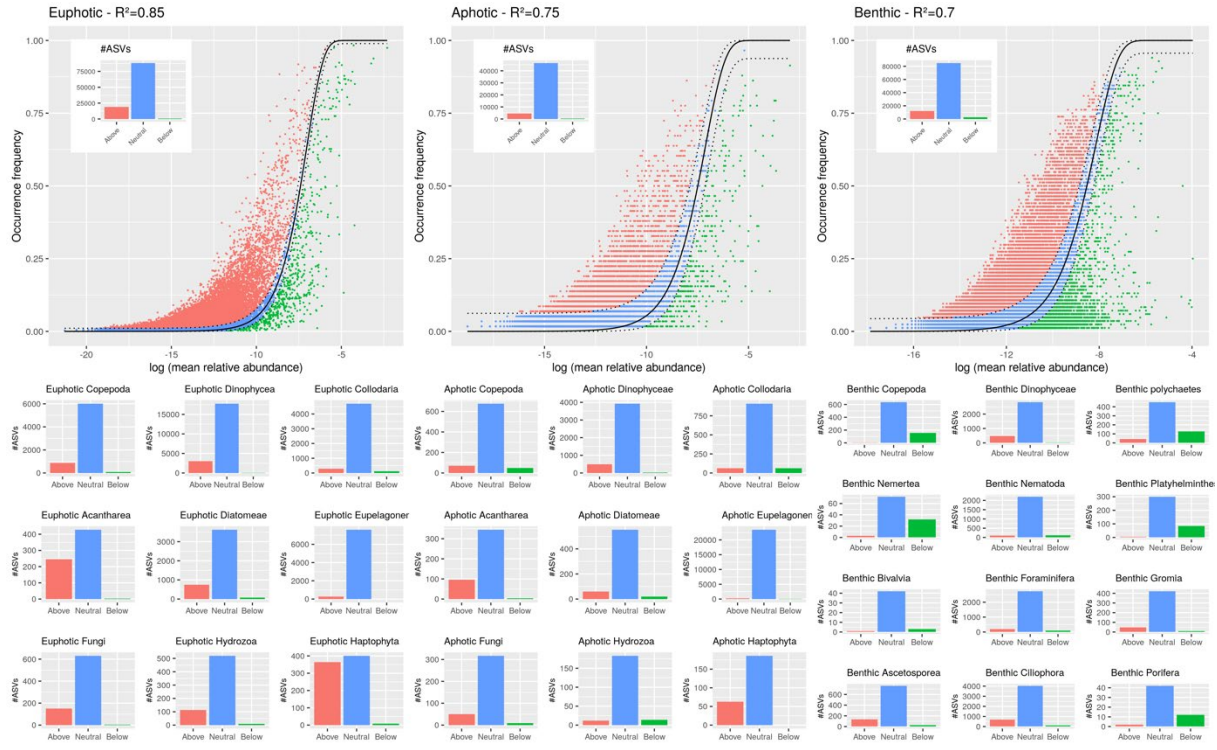

Figure S10: Neutral community assembly models fitting pelagic euphotic, pelagic aphotic and benthic eukaryotic communities. Datasets have been aggregated at the station level prior fitting. Goodness of fit ( $R^2$ ) are indicated in the titles of the plots. Insets within main plots represent the distribution of ASVs across the more geographically widespread category (in red) the neutral category (in blue) and the less geographically widespread category (in green) than expected by the model. The bottom panel below main plots display the distribution of ASVs across category for selected taxonomic groups.

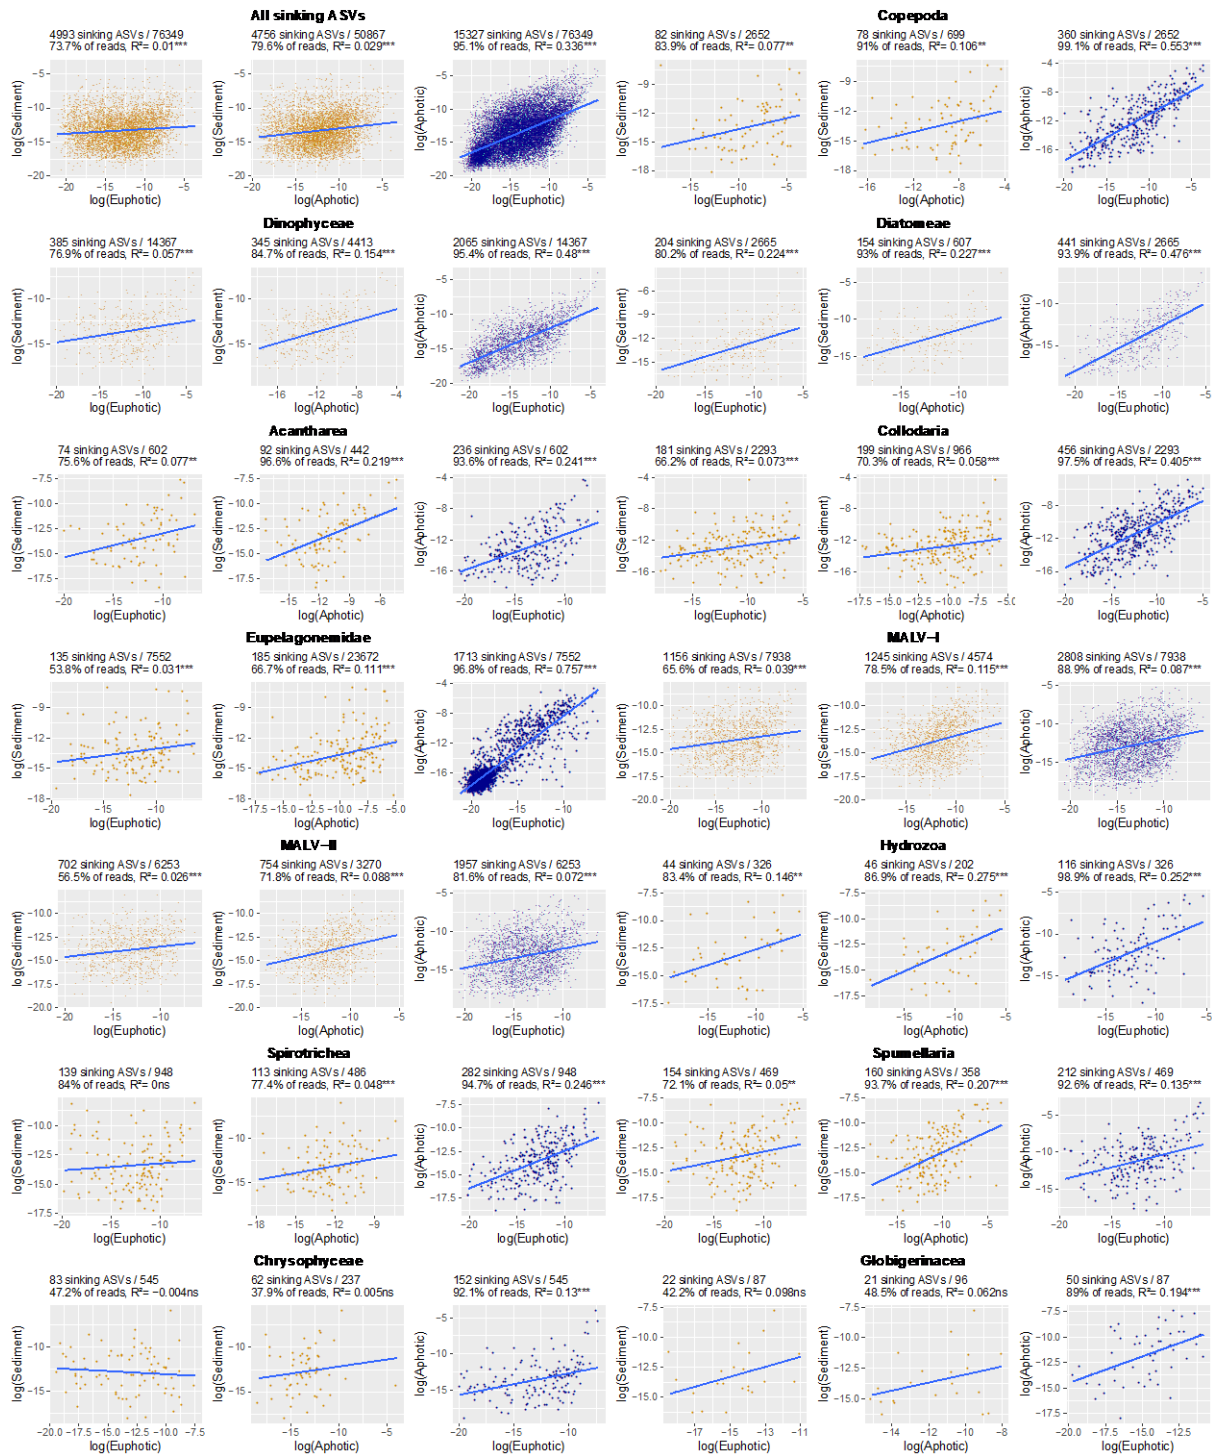

Figure S11: Correlation of relative abundance profiles (log transformed) between the sinking pelagic ASVs from the euphotic or aphotic realms and their respective abundance profile in the deep-ocean sediment (in orange). In blue is the correlation between euphotic and aphotic relative abundance profiles of pelagic ASVs also detected in the pelagic aphotic zone. The titles above each plot indicate the number of sinking ASVs compared to the number of ASVs of a given taxonomic group in the 'source realm' and the relative abundance within this source realm those sinking ASVs represent. For instance, 204 ASVs of diatoms out of the 2665 detected in the

Euphotic zone are detected in the sediment and these 204 ASVs represent 80.2% of diatom reads in the euphotic zone. Adjusted  $R^2$  and significance of linear models are reported (ns: non-significant, \*:  $p < 0.05$ , \*\*:  $p < 0.01$ , \*\*\*:  $p < 0.001$ ).

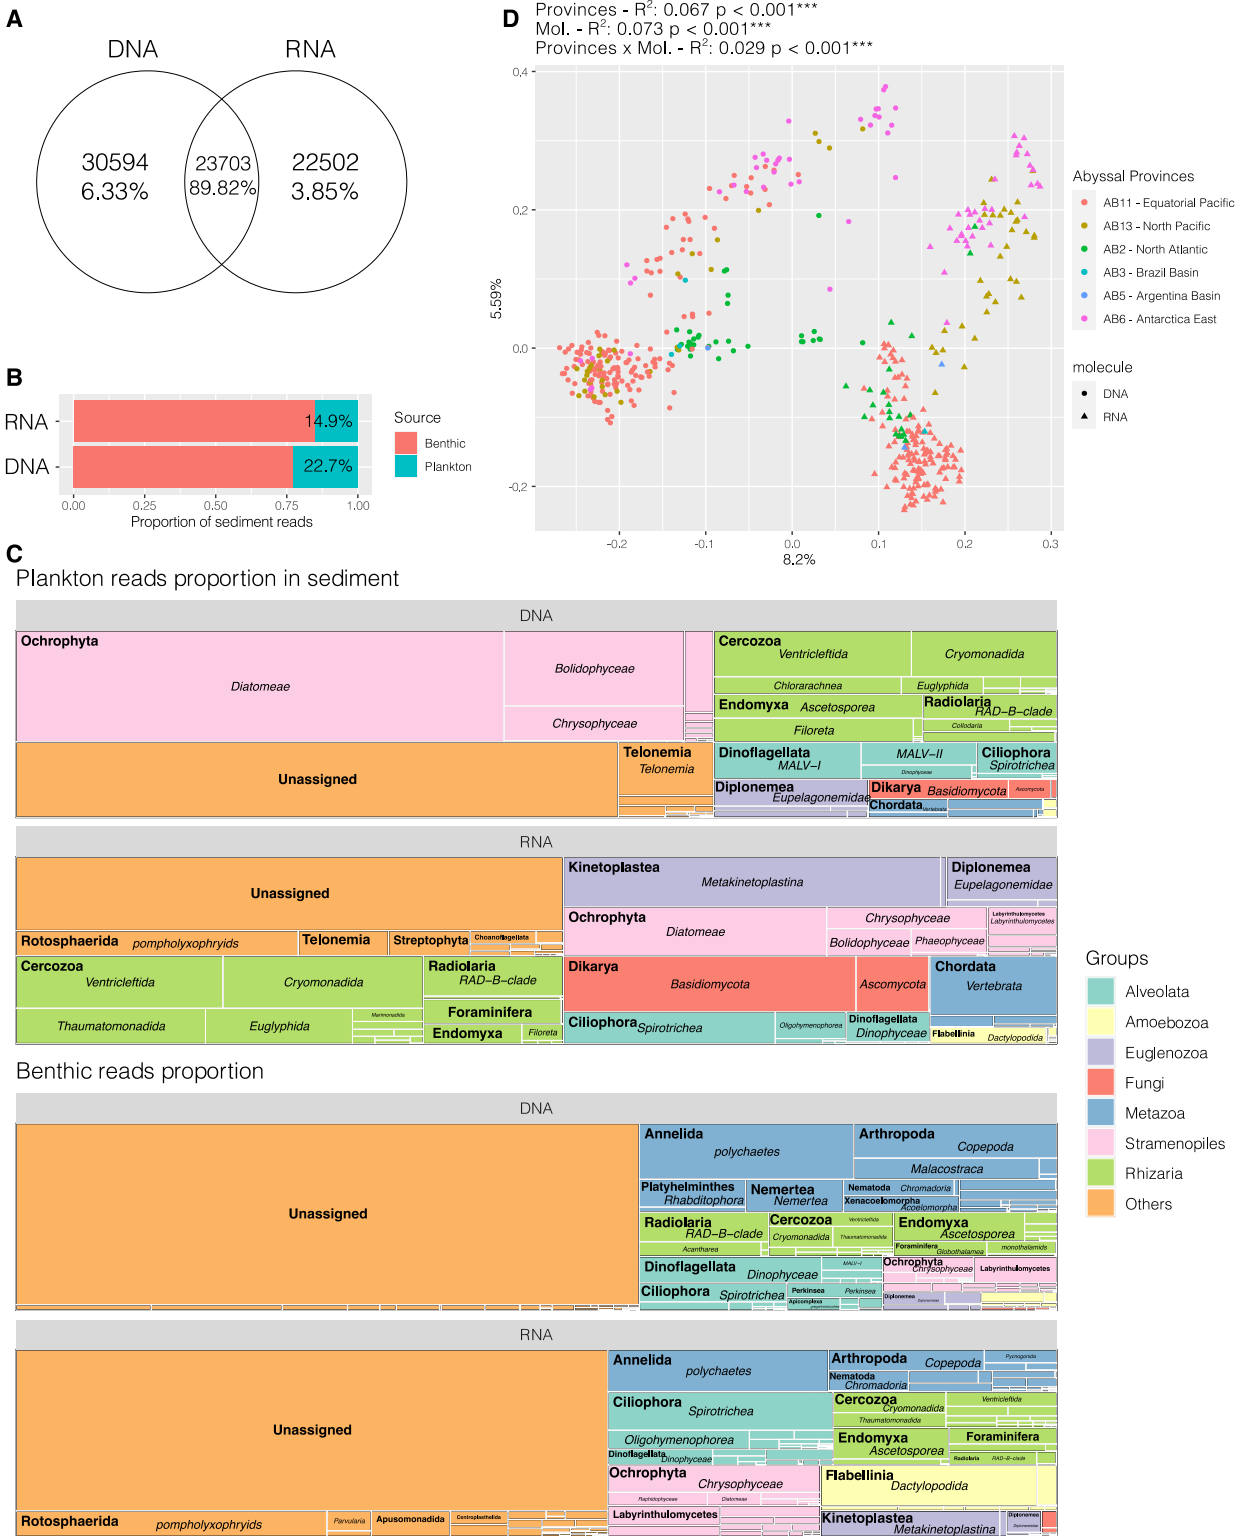

Figure S12: Comparative analysis of sediment DNA and RNA datasets obtained from the deep\_sea project samples. A) Number of ASVs and their relative abundances detected in both DNA and RNA libraries and only in DNA or RNA. A total of 89.82% of the sediment reads

represent ASVs present in both DNA and RNA V9 libraries, even though numerous rare ASVs are present either only in DNA or RNA. B) Proportion of sediment reads in DNA and RNA libraries as a function of their source (benthic vs planktonic). The proportion of plankton reads is higher in the DNA (22.7%) compared to RNA (14.9%). C) Relative abundances of taxonomic groups within the sinking plankton and benthic fractions in both DNA and RNA sediment libraries. It shows variations between DNA and RNA, mostly for the plankton fraction in the sediment (e.g. diatoms & dinoflagellates are more abundant in DNA than in RNA, whereas fungi and kinetoplastids are more abundant in the RNA. For the benthic fraction, the relative abundances of groups are much more consistent between DNA and RNA, with the notable exception of amoebae that are more abundant in the RNA. D) PCoA ordination of DNA and RNA samples as a function of geographical origin (using a Bray-Curtis dissimilarity matrix computed from normalized reads counts using the cumulative sum scaling method). Above the ordination are indicated the results of a permutational analysis of variance model, testing for the effects of biogeography and type of molecule (and their interaction) on the structure of sediment communities. The ordination shows that the biogeographic pattern is mostly mirrored between DNA and RNA, and although the interaction term between biogeography and molecule (DNA/RNA) is significant, it explains only 2.9% of the variation. Taken together, these results indicate that the diversity and the biogeographic signals are mostly similar between DNA and RNA.

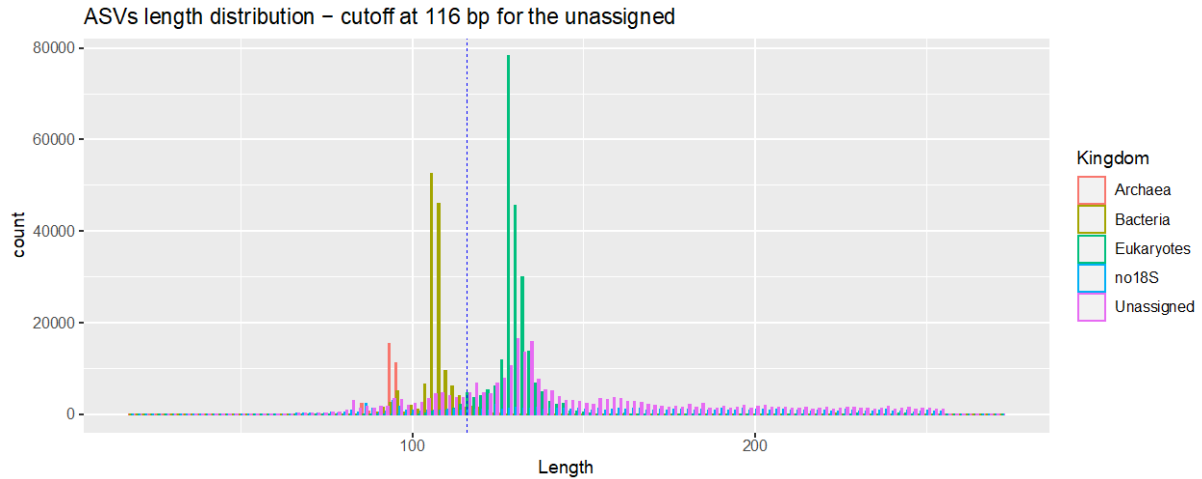

Figure S13: Length distribution of the ASVs. ASVs are colored after their taxonomic annotation on the SILVA v138 database. We removed prokaryotes, non-18S ASVs and any unassigned ASVs shorter than 116 bp long, because they may represent unassigned prokaryotes ASVs. For downstream analysis, we also kept only ASVs that match an eukaryotic reference sequence in PR<sup>2</sup> with at least 20% similarity and that contain the ‘GTCG’ sequence motif in the first four nucleotides in the 5’ end (see methods).



Table S1. Deep-ocean sediment dataset. Material origin, number of stations and biological samples

| Dataset      | Area                | Expedition | Biological samples | Stations  | Reference/cruise report    |
|--------------|---------------------|------------|--------------------|-----------|----------------------------|
| deep_sea     | North Atlantic      | MSM39      | 19                 | 6         | (85)                       |
| deep_sea     | Mid Atlantic        | VEMA       | 34                 | 5         | (86)                       |
| deep_sea     | South Atlantic      | DIVA3      | 9                  | 9         | No report available online |
| deep_sea     | Southern Ocean      | SYSTCOII   | 46                 | 4         | (87)                       |
| deep_sea     | North Pacific       | KuramBio   | 33                 | 11        | (88)                       |
| deep_sea     | East pacific - CCFZ | MANGAN'16  | 40                 | 14        | No report available online |
| deep_sea     | East pacific - CCFZ | BIONOD     | 8                  | 8         | (89)                       |
| deep_sea     | East pacific - CCFZ | ABYSSLINE  | 131                | 23        | No report available online |
| paw454       | Arctic Ocean        | ARK XXIV   | 3                  | 3         | (30)                       |
| paw454       | Southern Ocean      | ANDEEP II  | 3                  | 3         | (30)                       |
| eDNAbyss     | Arctic Ocean        | MarMine    | 49                 | 1         | (90)                       |
| eDNAbyss     | North Atlantic      | MEDWAVES   | 15                 | 1         | (91)                       |
| eDNAbyss     | Mediterranean Sea   | PEACETIME  | 16                 | 3         | (92)                       |
| eDNAbyss     | Mediterranean Sea   | ESSNAUT    | 11                 | 1         | (93)                       |
| eDNAbyss     | Mediterranean Sea   | CANHROV    | 7                  | 1         | (94)                       |
| Lie          | North Pacific       |            | 2                  | 2         | (67)                       |
| <b>TOTAL</b> |                     |            | <b>426</b>         | <b>95</b> |                            |

Table S2: Summary statistics of the 18S V9 sequencing data processing. #raw\_reads refers to the number of reads in raw files. #good\_reads refers to the number of reads that passed quality filtering. #analysed\_reads refers to the number of eukaryotic reads analysed in this study. References of the published datasets analysed in this study are reported

See the file 'Supp\_Tables\_S2\_S3\_S5\_S6\_S7\_S8.xlsx'

Table S3: Aggregated eukaryotic richness and abundance in the pelagic euphotic, pelagic aphotic, and sediment biomes (also split into benthic and sinking plankton fractions only)

See the file 'Supp\_Tables\_S2\_S3\_S5\_S6\_S7\_S8.xlsx'

Table S4: Explained compositional variance of benthic communities by a selection of environmental variables (stepwise dbRDA model building using the *ordiR2step* function of the vegan R package)

| environmental variables | R2.adj | Df | AIC      | F      | Pr(>F) | Inertia | Proportion |
|-------------------------|--------|----|----------|--------|--------|---------|------------|
| + Seabed nitrate        | 0.057  | 1  | 1582.988 | 20.999 | 0.002  | 7.764   | 6.35       |
| + POC export            | 0.086  | 1  | 1573.374 | 11.712 | 0.002  | 4.73    | 3.868      |
| + Seabed silicate       | 0.105  | 1  | 1567.645 | 7.726  | 0.002  | 2.534   | 2.072      |
| + POC seafloor          | 0.114  | 1  | 1565.141 | 4.466  | 0.002  | 1.266   | 1.035      |
| + Primary prod.         | 0.121  | 1  | 1563.567 | 3.529  | 0.002  | 0.871   | 0.713      |
| + Seabed salinity       | 0.125  | 1  | 1562.99  | 2.533  | 0.002  | 0.445   | 0.364      |
| + Seabed temperature    | 0.127  | 1  | 1563.1   | 1.85   | 0.002  | 0.428   | 0.35       |
| + Seabed dissolved O2   | 0.13   | 1  | 1563.044 | 2.007  | 0.002  | 0.399   | 0.326      |
| <All variables>         | 0.13   |    |          |        |        | 18.437  | 15.079     |
| Unconstrained           |        |    |          |        |        | 122.269 | 84.921     |
| Total                   |        |    |          |        |        | 140.705 | 100        |

Table S5: Mantel correlation between eukaryotic communities dissimilarity matrices and geographic distance. Distance decay parameters, initial similarity within 1 km distance, slope of linear models and halving distances, i.e. the distance after which the initial similarity is halved (95% confidence intervals values are indicated between brackets)

See the file ‘Supp\_Tables\_S2\_S3\_S5\_S6\_S7\_S8.xlsx’

Table S6: Pelagic ASVs detected in sediments that are associated with POC export from the surface or POC seafloor, based on a sparse partial least square (sPLS) regression. Their taxonomic and functional annotation is reported.

See the file ‘Supp\_Tables\_S2\_S3\_S5\_S6\_S7\_S8.xlsx’

Table S7: Full metadata table

See the file ‘Supp\_Tables\_S2\_S3\_S5\_S6\_S7\_S8.xlsx’

Table S8: Manual curation of the metazoan fraction of the pelagic ASVs sinking to the deep-ocean sediment

See the file ‘Supp\_Tables\_S2\_S3\_S5\_S6\_S7\_S8.xlsx’

## REFERENCES AND NOTES

1. A. R. Thurber, A. K. Sweetman, B. E. Narayanaswamy, D. O. B. Jones, J. Ingels, R. L. Hansman, Ecosystem function and services provided by the deep sea. *Biogeosciences* **11**, 3941–3963 (2014).
2. L. A. Levin, N. Le Bris, The deep ocean under climate change. *Science* **350**, 766–768 (2015).
3. D. Breitburg, L. A. Levin, A. Oschlies, M. Grégoire, F. P. Chavez, D. J. Conley, V. Garçon, D. Gilbert, D. Gutiérrez, K. Isensee, G. S. Jacinto, K. E. Limburg, I. Montes, S. W. A. Naqvi, G. C. Pitcher, N. N. Rabalais, M. R. Roman, K. A. Rose, B. A. Seibel, M. Telszewski, M. Yasuhara, J. Zhang, Declining oxygen in the global ocean and coastal waters. *Science* **359**, eaam7240 (2018).
4. C. R. Smith, V. Tunnicliffe, A. Colaço, J. C. Drazen, S. Gollner, L. A. Levin, N. C. Mestre, A. Metaxas, T. N. Molodtsova, T. Morato, A. K. Sweetman, T. Washburn, D. J. Amon, Deep-sea misconceptions cause underestimation of seabed-mining impacts. *Trends Ecol. Evol.* **35**, 853–857 (2020).
5. A. Pusceddu, S. Bianchelli, J. Martín, P. Puig, A. Palanques, P. Masqué, R. Danovaro, Chronic and intensive bottom trawling impairs deep-sea biodiversity and ecosystem functioning. *Proc. Natl. Acad. Sci. U.S.A.* **111**, 8861–8866 (2014).
6. E. B. Barbier, D. Moreno-Mateos, A. D. Rogers, J. Aronson, L. Pendleton, R. Danovaro, L. A. Henry, T. Morato, J. Ardrón, C. L. Van Dover, Protect the deep sea. *Nature* **505**, 475–477 (2014).
7. K. J. Mengerink, C. L. Van Dover, J. Ardrón, M. Baker, E. Escobar-Briones, K. Gjerde, J. A. Koslow, E. Ramirez-Llodra, A. Lara-Lopez, D. Squires, T. Sutton, A. K. Sweetman, L. A. Levin, A call for deep-ocean stewardship. *Science* **344**, 696–698 (2014).
8. L. A. Levin, D. J. Amon, H. Lily, Challenges to the sustainability of deep-seabed mining. *Nat. Sustain.* **3**, 784–794 (2020).
9. M. A. Rex, R. J. Etter, *Deep-Sea Biodiversity* (Harvard Univ. Press, 2010).
10. J. F. Grassle, L. S. Morse-Porteous, Macrofaunal colonization of disturbed deep-sea environments and the structure of deep-sea benthic communities. *Deep Sea Res. Part A* **34**, 1911–1915 (1987).

11. C. R. McClain, J. C. Nekola, L. Kuhnz, J. P. Barry, Local-scale faunal turnover on the deep Pacific seafloor. *Mar. Ecol. Prog. Ser.* **422**, 193–200 (2011).
12. R. Danovaro, E. Fanelli, J. Aguzzi, D. Billett, L. Carugati, C. Corinaldesi, A. Dell’Anno, K. Gjerde, A. J. Jamieson, S. Kark, C. McClain, L. Levin, N. Levin, E. Ramirez-Llodra, H. Ruhl, C. R. Smith, P. V. R. Snelgrove, L. Thomsen, C. L. Van Dover, M. Yasuhara, Ecological variables for developing a global deep-ocean monitoring and conservation strategy. *Nat. Ecol. Evol.* **4**, 181–192 (2020).
13. A. J. Gooday, A. Schoenle, J. R. Dolan, H. Arndt, Protist diversity and function in the dark ocean – Challenging the paradigms of deep-sea ecology with special emphasis on foraminiferans and naked protists. *Eur. J. Protistol.* **75**, 125721 (2020).
14. J. Ingels, A. Vanreusel, E. Pape, F. Pasotti, L. Macheriotou, P. M. Arbizu, M. V. Sørensen, V. P. Edgcomb, J. Sharma, N. Sánchez, W. B. Homoky, C. Woulds, D. Leduc, A. J. Gooday, J. Pawlowski, J. R. Dolan, M. Schratzberger, S. Gollner, A. Schoenle, H. Arndt, D. Zeppilli, Ecological variables for deep-ocean monitoring must include microbiota and meiofauna for effective conservation. *Nat. Ecol. Evol.* **5**, 27–29 (2021).
15. D. S. M. Billett, R. S. Lampitt, A. L. Rice, R. F. C. Mantoura, Seasonal sedimentation of phytoplankton to the deep-sea benthos. *Nature* **302**, 520–522 (1983).
16. H. Thiel, O. Pfannkuche, G. Schriever, K. Lochte, A. J. Gooday, C. Hemleben, R. F. G. Mantoura, C. M. Turley, J. W. Patching, F. Riemann, Phytodetritus on the deep-sea floor in a central oceanic region of the northeast Atlantic. *Biol. Oceanogr.* **6**, 203–239 (1988).
17. M. W. Silver, M. M. Gowing, The “particle” flux: Origins and biological components. *Prog. Oceanogr.* **26**, 75–113 (1991).
18. X. Zheng, W. Liu, X. Dai, Y. Zhu, J. Wang, Y. Zhu, H. Zheng, Y. Huang, Z. Dong, W. Du, F. Zhao, L. Huang, Extraordinary diversity of viruses in deep-sea sediments as revealed by metagenomics without prior virion separation. *Environ. Microbiol.* **23**, 728–743 (2020).
19. R. Danovaro, M. Molari, C. Corinaldesi, A. Dell’Anno, Macroecological drivers of archaea and bacteria in benthic deep-sea ecosystems. *Sci. Adv.* **2**, e1500961 (2016).

20. C. Bienhold, L. Zinger, A. Boetius, A. Ramette, Diversity and biogeography of bathyal and abyssal seafloor bacteria. *PLOS ONE* **11**, e0148016 (2016).
21. C. N. Shulse, B. Maillot, C. R. Smith, M. J. Church, Polymetallic nodules, sediments, and deep waters in the equatorial North Pacific exhibit highly diverse and distinct bacterial, archaeal, and microeukaryotic communities. *Microbiology* **6**, e00428 (2017).
22. T. Hoshino, H. Doi, G. I. Uramoto, L. Wörmer, R. R. Adhikari, N. Xiao, Y. Morono, S. D'Hondt, K. U. Hinrichs, F. Inagaki, Global diversity of microbial communities in marine sediment. *Proc. Natl. Acad. Sci. U.S.A.* **117**, 27587–27597 (2020).
23. B. Lecroq, F. Lejzerowicz, D. Bachar, R. Christen, P. Esling, L. Baerlocher, M. Osterås, L. Farinelli, J. Pawlowski, Ultra-deep sequencing of foraminiferal microbarcodes unveils hidden richness of early monothalamous lineages in deep-sea sediments. *Proc. Natl. Acad. Sci. U.S.A.* **108**, 13177–13182 (2011).
24. F. Lejzerowicz, P. Esling, J. Pawlowski, Patchiness of deep-sea benthic Foraminifera across the Southern Ocean: Insights from high-throughput DNA sequencing. *Deep Sea Res. II Top. Stud. Oceanogr.* **108**, 17–26 (2014).
25. F. Sinniger, J. Pawlowski, S. Harii, A. J. Gooday, H. Yamamoto, P. Chevaldonné, T. Cedhagen, G. Carvalho, S. Creer, Worldwide analysis of sedimentary DNA reveals major gaps in taxonomic knowledge of deep-sea benthos. *Front. Mar. Sci.* **3**, 1–14 (2016).
26. R. Danovaro, J. B. Company, C. Corinaldesi, G. D'Onghia, B. Galil, C. Gambi, A. J. Gooday, N. Lampadariou, G. M. Luna, C. Morigi, K. Olu, P. Polymenakou, E. Ramirez-Llodra, A. Sabbatini, F. Sardá, M. Sibuet, A. Tselepides, Deep-sea biodiversity in the Mediterranean Sea: The known, the unknown, and the unknowable. *PLOS ONE* **5**, e11832 (2010).
27. V. G. Fonseca, F. Sinniger, J. M. Gaspar, C. Quince, S. Creer, D. M. Power, L. S. Peck, M. S. Clark, Revealing higher than expected meiofaunal diversity in Antarctic sediments: A metabarcoding approach. *Sci. Rep.* **7**, 6094 (2017).

28. O. Laroche, O. Kersten, C. R. Smith, E. Goetze, From sea surface to seafloor: A benthic allochthonous eDNA survey for the abyssal ocean. *Front. Mar. Sci.* **7**, 1–16 (2020).
29. F. Lejzerowicz, A. J. Gooday, I. B. Angeles, T. Cordier, R. Morard, L. Apothéloz-perret-gentil, L. Lins, Eukaryotic biodiversity and spatial patterns in the Clarion-Clipperton Zone and other abyssal regions: Insights from sediment DNA and RNA metabarcoding. *Front. Mar. Sci.* **8**, 1–23 (2021).
30. J. Pawlowski, R. Christen, B. Lecroq, D. Bachar, H. R. Shahbazkia, L. Amaral-Zettler, L. Guillou, Eukaryotic richness in the abyss: Insights from pyrotag sequencing. *PLOS ONE* **6**, e18169 (2011).
31. M. V. Lindh, B. M. Maillot, C. N. Shulse, A. J. Gooday, D. J. Amon, C. R. Smith, M. J. Church, From the surface to the deep-sea: Bacterial distributions across polymetallic nodule fields in the Clarion-Clipperton Zone of the Pacific Ocean. *Front. Microbiol.* **8**, 1696 (2017).
32. R. Morard, F. Lejzerowicz, K. F. Darling, B. Lecroq-Bennet, M. W. Pedersen, L. Orlando, J. Pawlowski, S. Mulitza, C. De Vargas, M. Kucera, Planktonic foraminifera-derived environmental DNA extracted from abyssal sediments preserves patterns of plankton macroecology. *Biogeosciences* **14**, 2741–2754 (2017).
33. C. de Vargas, S. Audic, N. Henry, J. Decelle, F. Mahe, R. Logares, E. Lara, C. Berney, N. Le Bescot, I. Probert, M. Carmichael, J. Poulain, S. Romac, S. Colin, J.-M. Aury, L. Bittner, S. Chaffron, M. Dunthorn, S. Engelen, O. Flegontova, L. Guidi, A. Horak, O. Jaillon, G. Lima-Mendez, J. Luke, S. Malviya, R. Morard, M. Mulot, E. Scalco, R. Siano, F. Vincent, A. Zingone, C. Dimier, M. Picheral, S. Searson, S. Kandels-Lewis, S. G. Acinas, P. Bork, C. Bowler, G. Gorsky, N. Grimsley, P. Hingamp, D. Iudicone, F. Not, H. Ogata, S. Pesant, J. Raes, M. E. Sieracki, S. Speich, L. Stemmann, S. Sunagawa, J. Weissenbach, P. Wincker, E. Karsenti, E. Boss, M. Follows, L. Karp-Boss, U. Krzic, E. G. Reynaud, C. Sardet, M. B. Sullivan, D. Velayoudon, Eukaryotic plankton diversity in the sunlit ocean. *Science* **348**, 1261605 (2015).
34. F. M. Ibarbalz, N. Henry, M. C. Brandão, S. Martini, G. Busseni, H. Byrne, L. P. Coelho, H. Endo, J. M. Gasol, A. C. Gregory, F. Mahé, J. Rigonato, M. Royo-Llonch, G. Salazar, I. Sanz-Sáez, E. Scalco, D. Soviadan, A. A. Zayed, A. Zingone, K. Labadie, J. Ferland, C. Marec, S. Kandels, M. Picheral, C. Dimier, J. Poulain, S. Pisarev, M. Carmichael, S. Pesant, M. Babin, E. Boss, D.



- Iudicone, O. Jaillon, S. G. Acinas, H. Ogata, E. Pelletier, L. Stemmann, M. B. Sullivan, S. Sunagawa, L. Bopp, C. de Vargas, L. Karp-Boss, P. Wincker, F. Lombard, C. Bowler, L. Zinger, S. G. Acinas, M. Babin, P. Bork, E. Boss, C. Bowler, G. Cochrane, C. de Vargas, M. Follows, G. Gorsky, N. Grimsley, L. Guidi, P. Hingamp, D. Iudicone, O. Jaillon, S. Kandels, L. Karp-Boss, E. Karsenti, F. Not, H. Ogata, S. Pesant, N. Poulton, J. Raes, C. Sardet, S. Speich, L. Stemmann, M. B. Sullivan, S. Sunagawa, P. Wincker, F. Lombard, C. Bowler, L. Zinger, Global trends in marine plankton diversity across kingdoms of life. *Cell* **179**, 1084–1097.e21 (2019).
35. A. Obiol, C. R. Giner, P. Sánchez, C. M. Duarte, S. G. Acinas, R. Massana, A metagenomic assessment of microbial eukaryotic diversity in the global ocean. *Mol. Ecol. Resour.* 718–731 (2020).
36. M. C. Pernice, C. R. Giner, R. Logares, J. Perera-Bel, S. G. Acinas, C. M. Duarte, J. M. Gasol, R. Massana, Large variability of bathypelagic microbial eukaryotic communities across the world's oceans. *ISME J.* **10**, 945–958 (2016).
37. O. Flegontova, P. Flegontov, S. Malviya, S. Audic, P. Wincker, C. de Vargas, C. Bowler, J. Lukeš, A. Horák, Extreme diversity of diplomonid eukaryotes in the Ocean. *Curr. Biol.* **26**, 3060–3065 (2016).
38. D. Morgan-Smith, M. A. Clouse, G. J. Herndl, A. B. Bochdansky, Diversity and distribution of microbial eukaryotes in the deep tropical and subtropical North Atlantic Ocean. *Deep. Res. I Oceanogr. Res. Pap.* **78**, 58–69 (2013).
39. E. Lara, D. Moreira, A. Vereshchaka, P. López-García, Pan-oceanic distribution of new highly diverse clades of deep-sea diplomonids. *Environ. Microbiol.* **11**, 47–55 (2009).
40. D. Forster, G. Lentendu, S. Filker, E. Dubois, T. A. Wilding, T. Stoeck, Improving eDNA-based protist diversity assessments using networks of amplicon sequence variants. *Environ. Microbiol.* **21**, 4109–4124 (2019).

41. F. Zhao, S. Filker, K. Xu, J. Li, T. Zhou, P. Huang, Effects of intragenomic polymorphism in the SSU rRNA gene on estimating marine microeukaryotic diversity: A test for ciliates using single-cell high-throughput DNA sequencing. *Limnol. Oceanogr. Methods* **17**, 533–543 (2019).
42. L. Watling, J. Guinotte, M. R. Clark, C. R. Smith, A proposed biogeography of the deep ocean floor. *Prog. Oceanogr.* **111**, 91–112 (2013).
43. C. R. McClain, M. A. Rex, Toward a conceptual understanding of  $\beta$ -diversity in the deep-sea benthos. *Annu. Rev. Ecol. Evol. Syst.* **46**, 623–642 (2015).
44. L. Zinger, L. A. Amaral-Zettler, J. A. Fuhrman, M. C. Horner-Devine, S. M. Huse, D. B. M. Welch, J. B. H. Martiny, M. Sogin, A. Boetius, A. Ramette, Global patterns of bacterial beta-diversity in seafloor and seawater ecosystems. *PLOS ONE* **6**, e24570 (2011).
45. D. Zeppilli, A. Pusceddu, F. Trincardi, R. Danovaro, Seafloor heterogeneity influences the biodiversity-ecosystem functioning relationships in the deep sea. *Sci. Rep.* **6**, 26352 (2016).
46. E. Acevedo-Trejos, E. Marañón, A. Merico, Phytoplankton size diversity and ecosystem function relationships across oceanic regions. *Proc. R. Soc. B* **285**, 20180621 (2018).
47. A. D. Barton, A. J. Pershing, E. Litchman, N. R. Record, K. F. Edwards, Z. V. Finkel, T. Kiørboe, B. A. Ward, The biogeography of marine plankton traits. *Ecol. Lett.* **16**, 522–534 (2013).
48. D. Boeuf, B. R. Edwards, J. M. Eppley, S. K. Hu, K. E. Poff, A. E. Romano, D. A. Caron, D. M. Karl, E. F. DeLong, Biological composition and microbial dynamics of sinking particulate organic matter at abyssal depths in the oligotrophic open ocean. *Proc. Natl. Acad. Sci. U.S.A.* **116**, 11824–11832 (2019).
49. K. E. Poff, A. O. Leu, J. M. Eppley, D. M. Karl, E. F. DeLong, Microbial dynamics of elevated carbon flux in the open ocean's abyss. *Proc. Natl. Acad. Sci. U.S.A.* **118**, e2018269118 (2021).
50. C. M. Preston, C. A. Durkin, K. M. Yamahara, DNA metabarcoding reveals organisms contributing to particulate matter flux to abyssal depths in the North East Pacific ocean. *Deep. Res. II Top. Stud. Oceanogr.* **173**, 104708 (2020).

51. L. Guidi, S. Chaffron, L. Bittner, D. Eveillard, A. Larhlimi, S. Roux, Y. Darzi, S. Audic, L. Berline, J. R. Brum, L. P. Coelho, J. C. I. Espinoza, S. Malviya, S. Sunagawa, C. Dimier, S. Kandels-Lewis, M. Picheral, J. Poulain, S. Searson, L. Stemmann, F. Not, P. Hingamp, S. Speich, M. Follows, L. Karp-Boss, E. Boss, H. Ogata, S. Pesant, J. Weissenbach, P. Wincker, S. G. Acinas, P. Bork, C. De Vargas, D. Iudicone, M. B. Sullivan, J. Raes, E. Karsenti, C. Bowler, G. Gorsky, Plankton networks driving carbon export in the oligotrophic ocean. *Nature* **532**, 465–470 (2016).
52. S. Agusti, J. I. González-Gordillo, D. Vaqué, M. Estrada, M. I. Cerezo, G. Salazar, J. M. Gasol, C. M. Duarte, Ubiquitous healthy diatoms in the deep sea confirm deep carbon injection by the biological pump. *Nat. Commun.* **6**, 7608 (2015).
53. T. Biard, E. Bigeard, S. Audic, J. Poulain, A. Gutierrez-Rodriguez, S. Pesant, L. Stemmann, F. Not, Biogeography and diversity of Collodaria (Radiolaria) in the global ocean. *ISME J.* **11**, 1331–1344 (2017).
54. I. Barrenechea Angeles, F. Lejzerowicz, T. Cordier, J. Scheplitz, S. Mulitza, M. Kucera, D. Ariztegui, J. Pawlowski, R. Morard, Planktonic foraminifera eDNA signature deposited on the seafloor remains preserved after burial in marine sediments. *Sci. Rep.*, **20351** (2020).
55. L. Armbricht, G. Hallegraeff, C. J. S. Bolch, C. Woodward, A. Cooper, Hybridisation capture allows DNA damage analysis of ancient marine eukaryotes. *Sci. Rep.* **11**, 3220 (2021).
56. J. B. Kirkpatrick, E. A. Walsh, S. D’Hondt, Fossil DNA persistence and decay in marine sediment over hundred-thousand-year to million-year time scales. *Geology* **44**, 615–618 (2016).
57. S. De Schepper, J. L. Ray, K. S. Skaar, H. Sadatzki, U. Z. Ijaz, R. Stein, A. Larsen, The potential of sedimentary ancient DNA for reconstructing past sea ice evolution. *ISME J.* **13**, 2566–2577 (2019).
58. S. A. Henson, R. Sanders, E. Madsen, P. J. Morris, F. Le Moigne, G. D. Quartly, A reduced estimate of the strength of the ocean’s biological carbon pump. *Geophys. Res. Lett.* **38**, L04606 (2011).
59. M. J. Lutz, K. Caldeira, R. B. Dunbar, M. J. Behrenfeld, Seasonal rhythms of net primary production and particulate organic carbon flux to depth describe the efficiency of biological pump in the global ocean. *J. Geophys. Res.* **112**, C10011 (2007).

60. L. Guidi, L. Legendre, G. Reygondeau, J. Uitz, L. Stemann, S. A. Henson, A new look at ocean carbon remineralization for estimating deepwater sequestration. *Global Biogeochem. Cycles* **29**, 1044–1059 (2015).
61. D. S. M. Billett, R. S. Lampitt, A. L. Rice, R. C. F. Mantoura, Seasonal sedimentation of phytoplankton to the deep-sea benthos, 520–522. *Nature* **302**, 520–522 (1983).
62. D. K. Steinberg, M. R. Landry, Zooplankton and the Ocean Carbon Cycle. *Ann. Rev. Mar. Sci.* **9**, 413–444 (2017).
63. C. R. Smith, F. C. De Leo, A. F. Bernardino, A. K. Sweetman, P. M. Arbizu, Abyssal food limitation, ecosystem structure and climate change. *Trends Ecol. Evol.* **23**, 518–528 (2008).
64. F. Lejzerowicz, P. Esling, L. Pillet, T. A. Wilding, K. D. Black, J. Pawlowski, High-throughput sequencing and morphology perform equally well for benthic monitoring of marine ecosystems. *Sci. Rep.* **5**, 13932 (2015).
65. J. Pawlowski, P. Esling, F. Lejzerowicz, T. Cedhagen, T. A. Wilding, Environmental monitoring through protist next-generation sequencing metabarcoding: Assessing the impact of fish farming on benthic foraminifera communities. *Mol. Ecol. Resour.* **14**, 1129–1140 (2014).
66. L. A. Amaral-Zettler, E. A. McCliment, H. W. Ducklow, S. M. Huse, A method for studying protistan diversity using massively parallel sequencing of V9 hypervariable regions of small-subunit ribosomal RNA Genes. *PLOS ONE* **4**, e6372 (2009).
67. A. A. Y. Lie, Z. Liu, S. K. Hu, A. C. Jones, D. Y. Kim, P. D. Countway, L. A. Amaral-Zettler, S. C. Cary, E. B. Sherr, B. F. Sherr, R. J. Gast, D. A. Caron, Investigating microbial eukaryotic diversity from a global census: Insights from a comparison of pyrotag and full-length sequences of 18S rRNA genes. *Appl. Environ. Microbiol.* **80**, 4363–4373 (2014).
68. D. Xu, R. Li, C. Hu, P. Sun, N. Jiao, A. Warren, Microbial eukaryote diversity and activity in the water column of the South China sea based on DNA and RNA high throughput sequencing. *Front. Microbiol.* **8**, 1121 (2017).

69. C. de Vargas, T. Pollina, S. Romac, N. Le Bescot, N. Henry, C. Berger, S. Colin, N. Haëntjens, M. Carmichael, D. Le Guen, J. Decelle, F. Mahé, E. Malpot, C. Beaumont, M. Hardy, D. Guiffant, I. Probert, D. F. Gruber, A. Allen, G. Gorsky, M. Follows, B. B. Cael, X. Pochon, R. Troublé, F. Lombard, E. Boss, M. Prakash, *Plankton Planet*: ‘Seatizen’ oceanography to assess open ocean life at the planetary scale. *bioRxiv*, 2020.08.31.263442 (2020).
70. A. K. Sweetman, A. R. Thurber, C. R. Smith, L. A. Levin, C. Mora, C.-L. Wei, A. J. Gooday, D. O. B. Jones, M. Rex, M. Yasuhara, J. Ingels, H. A. Ruhl, C. A. Frieder, R. Danovaro, L. Würzberg, A. Baco, B. M. Grupe, A. Pasulka, K. S. Meyer, K. M. Dunlop, L.-A. Henry, J. M. Roberts, Major impacts of climate change on deep-sea benthic ecosystems. *Elementa* **5**, 4 (2017).
71. B. J. Callahan, P. J. McMurdie, M. J. Rosen, A. W. Han, A. J. A. Johnson, S. P. Holmes, DADA2: High-resolution sample inference from Illumina amplicon data. *Nat. Methods* **13**, 581–583 (2016).
72. M. Martin, Cutadapt removes adapter sequences from high-throughput sequencing reads. *EMBnet J.* **17**, 10 (2011).
73. M. Guardiola, O. S. Wangensteen, P. Taberlet, E. Coissac, M. J. Uriz, X. Turon, Spatio-temporal monitoring of deep-sea communities using metabarcoding of sediment DNA and RNA. *PeerJ.* **4**, e2807 (2016).
74. Y. Dufresne, F. Lejzerowicz, L. A. Perret-Gentil, J. Pawlowski, T. Cordier, SLIM: A flexible web application for the reproducible processing of environmental DNA metabarcoding data. *BMC Bioinformatics* **20**, 88 (2019).
75. T. Rognes, T. Flouri, B. Nichols, C. Quince, F. Mahé, VSEARCH: A versatile open source tool for metagenomics. *PeerJ.* **4**, e2584 (2016).
76. C. Quast, E. Pruesse, P. Yilmaz, J. Gerken, T. Schweer, P. Yarza, J. Peplies, F. O. Glöckner, The SILVA ribosomal RNA gene database project: Improved data processing and web-based tools. *Nucleic Acids Res.* **41**, D590–D596 (2013).

77. J. Oksanen, F. G. Blanchet, M. Friendly, R. Kindt, P. Legendre, D. McGlinn, P. R. Minchin, R. B. O'Hara, G. L. Simpson, P. Solymos, M. H. H. Stevens, E. Szoecs, H. Wagner, *vegan: Community Ecology Package*. R package version 2.5–3 (2018), doi:10.4135/9781412971874.n145.
78. A. Kassambara, *ggpubr: "ggplot2" Based Publication Ready Plots* (2020).
79. J. N. Paulson, O. C. Stine, H. C. Bravo, M. Pop, Differential abundance analysis for microbial marker-gene surveys. *Nat. Methods* **10**, 1200–2 (2013).
80. E. Paradis, K. Schliep, *ape 5.0: An environment for modern phylogenetics and evolutionary analyses in R*. *Bioinformatics* **35**, 526–528 (2019).
81. J. Soininen, R. McDonald, H. Hillebrand, The distance decay of similarity in ecological communities. *Ecography* **30**, 3–12 (2007).
82. W. T. Sloan, S. Woodcock, M. Lunn, I. M. Head, T. P. Curtis, Modeling taxa-abundance distributions in microbial communities using environmental sequence data. *Microb. Ecol.* **53**, 443–455 (2007).
83. M. N. Wright, A. Ziegler, *Ranger: A fast implementation of random forests for high dimensional data in C++ and R*. *J. Stat. Softw.* **77**, 10.18637/jss.v077.i01 (2017).
84. F. Rohart, B. Gautier, A. Singh, K. A. Lê Cao, *mixOmics: An R package for 'omics feature selection and multiple data integration*. *PLOS Comput. Biol.* **13**, e1005752 (2017).
85. S. Mulitza, F. Bergmann, L. Brück, C. M. Chiessi, A. Govin, M. Klann, H. Kuhnert, B. Lübben, L. Max, V. Meyer, R. Morard, V. Müller, G. Patton, A. Paul, A. Poirier, P. Riesen, T. Schade, U. Stöber, G. S. Völker, R. Völpel, T. von Dobeneck, Cruise No. MSM39 - June 07-June 25, 2014 - St. John's (Canada) - St. John's (Canada). In *MARIA S. MERIAN-Berichte* (2015); [http://dx.doi.org/10.2312/cr\\_msm39](http://dx.doi.org/10.2312/cr_msm39).
86. C. W. Devey, Ed., *RV SONNE Fahrtbericht / Cruise Report SO237 Vema-TRANSIT : bathymetry of the Vema-Fracture-Zone and Puerto Rico Trench and Abyssal Atlantic Biodiversity Study*, Las

Palmas (Spain) - Santo Domingo (Dom. Rep.) 14.12.14–26.01.15 (2015);  
[http://dx.doi.org/10.3289/GEOMAR\\_REP\\_NS\\_23\\_2015](http://dx.doi.org/10.3289/GEOMAR_REP_NS_23_2015).

87. D. Wolf-Gladrow, The expedition of the research vessel “Polarstern” to the Antarctic in 2012 (ANT-XXVIII/3). *Berichte zur Polar- und Meeresforsch. = Reports polar Mar. Res.* **661** (2013);  
<http://hdl.handle.net/10013/epic.41332>.
88. A. Brandt, M. Malyutina, I. Alalykina, B. N., C. A., N. Elsner, F. V., O. Golovan, G. Kamenev, V. Kharlamenko, A. Lavrenteva, F. Lejzerowicz, A. Maiorova, M. I., D. Miljutin, K. Minin, J. Packmor, K. Richter, T. Riehl, L. Schwabe, The German-Russian deep-sea expedition KuramBio (Kurile Kamchatka Biodiversity Study) to the Kurile Kamchatka Trench and abyssal plain on board of the R/V Sonne, 223rd Expedition (July 21th – September 7th 2012). Cruise report. (2012);  
<http://dx.doi.org/10.13140/RG.2.1.2473.6401>.
89. L. Menot, BIONOD cruise, RV L’Atalante (2012); <https://doi.org/10.17600/12010030>.
90. M. Ludvigsen, K. Aasly, S. L. Ellefmo, A. Hilário, E. Ramirez-Llodra, F. X. Søreide, I. Falcon-Suarez, C. J. Juliani, A. Kieswetter, A. Lim, M. Christian, S. M. Nornes, H. Reimers, E. Paulsen, Ø. Sture, MarMine cruise report - Arctic Mid-Ocean Ridge 15.08.2016–05.09.2016 (2016);  
<http://hdl.handle.net/11250/2427715>.
91. C. Orejas, A. Addamo, M. Alvarez, A. Aparicio, D. Alcoverro, S. Arnaud-Haond, M. Bilan, J. Boavida, V. Cainzos, R. Calderon, P. Cambeiro, M. Castano, A. Fox, M. Gallardo, A. Gori, C. Guitierrez, L.-A. Henry, M. Hermida, J. A. Jimenez, J. L. Lopez-Jurado, P. Lozano, A. Mateo-Ramirez, G. Mateu, J. L. Matoso, C. Mendez, A. Morillas, J. Movilla, A. Olariaga, M. Paredes, V. Pelayo, S. Pineiro, M. Rakka, T. Ramirez, M. Ramos, J. Reis, J. Rivera, A. Romero, J. L. Rueda, T. Salvador, I. Sampaio, H. Sanchez, R. Santiago, A. Serrano, G. Taranto, J. Urra, P. Velez-Belchi, N. Viladrich, M. Zein, Cruise Summary Report - MEDWAVES survey (MEDiterranean out flow WAter and Vulnerable EcosystemS). (2017); <https://doi.org/10.5281/zenodo.556516>.
92. C. Guieu, K. Desboeufs, PEACETIME cruise, RV Pourquoi pas ? (2017);  
<https://doi.org/10.17600/17000300>.

93. M.-A. Cambon-Bonavita, ESSNAUT 2017 cruise, RV Pourquoi pas ? (2017);  
<https://doi.org/10.17600/17009100>.

94. E. Raugel, CANHROV cruise, RV L'Europe, (2016); <https://doi.org/10.17600/16012300>.
